# Supplementary material for: Effects of Blood Contamination and the Rostro-Caudal Gradient on the Human Cerebrospinal Fluid Proteome
Source: PubMed Central journal article supplement (PMC3943968; doi:10.1371/journal.pone.0090429), 2014-03-05
Supplement: pone.0090429.s002.pdf [file pone.0090429.s002.pdf]

**Supplementary Table 1:** Name, sequence, transition used for quantification, Q1, Q3 and CE used for MRM analysis

| Protein ID                                                     | Acc. No | Peptide sequence                                                                      | Transition used for quantification | Endogenous peptide |        | SIS peptide |        | Collision energy |
|----------------------------------------------------------------|---------|---------------------------------------------------------------------------------------|------------------------------------|--------------------|--------|-------------|--------|------------------|
|                                                                |         |                                                                                       |                                    | Q1                 | Q3     | Q1          | Q3     |                  |
| Alpha-1-acid glycoprotein 1                                    | P02763  | WFYIASAFR<br>TEDTIFLR                                                                 | y7                                 | 580.8              | 827.4  | 585.8       | 837.4  | 21               |
|                                                                |         |                                                                                       | y5                                 | 497.8              | 649.4  | 502.8       | 659.4  | 23               |
| Alpha-1-antichymotrypsin                                       | P01011  | EIGELYLPK<br>ITLLSALVETR<br>EQLSLDR                                                   | y5                                 | 531.3              | 633.4  | 535.3       | 641.4  | 19               |
|                                                                |         |                                                                                       | y7                                 | 608.4              | 775.4  | 613.4       | 785.4  | 29               |
|                                                                |         |                                                                                       | y5                                 | 487.3              | 603.3  | 492.3       | 613.4  | 23               |
| Alpha-1-antitrypsin                                            | P01009  | SVLGQLGITK                                                                            | y7                                 | 508.3              | 716.4  | 512.3       | 724.4  | 17               |
| Alpha-2-macroglobulin                                          | P01023  | AIGYLNTGYQR                                                                           | y9                                 | 628.3              | 1071.5 | 633.3       | 1081.5 | 35               |
| Amyloid beta A4 protein                                        | P05067  | LVFFAEDVGSNK<br>VESLEQEAANER                                                          | y10                                | 663.3              | 1113.5 | 667.3       | 1121.5 | 39               |
|                                                                |         |                                                                                       | y7                                 | 687.8              | 817.4  | 692.8       | 827.4  | 35               |
| Amyloid-like protein 1                                         | P51693  | VLLALR<br>AALEGFLAALQADPPQAER                                                         | y4                                 | 342.7              | 472.3  | 347.7       | 482.3  | 25               |
|                                                                |         |                                                                                       | y6                                 | 984.5              | 697.4  | 989.5       | 707.4  | 53               |
| Apolipoprotein A-I                                             | P02647  | THLAPYSDELK<br>DLATVYVDVVK                                                            | y7                                 | 651.3              | 879.4  | 656.3       | 889.4  | 32               |
|                                                                |         |                                                                                       | y6                                 | 618.3              | 736.4  | 622.4       | 744.4  | 21               |
| Apolipoprotein D                                               | P05090  | NILTSNNIDVK                                                                           | y9                                 | 615.8              | 1003.5 | 619.8       | 1011.6 | 24               |
| Apolipoprotein E                                               | P02649  | SELEEQLTPVAEETR                                                                       | y7                                 | 865.9              | 801.4  | 870.9       | 811.4  | 40               |
| Brevican core protein                                          | Q96GW7  | GVVFLYR<br>YPIVTPSQR                                                                  | y4                                 | 427.3              | 598.3  | 432.3       | 608.3  | 13               |
|                                                                |         |                                                                                       | y6                                 | 530.8              | 687.4  | 535.8       | 697.4  | 23               |
| Cell surface glycoprotein MUC18                                | P43121  | GATLALTOVTPQDER <sup>a</sup><br>EVTVPVFPYPTK <sup>a</sup><br>NGYPIQVIWYK <sup>a</sup> | y5                                 | 533.9              | 644.3  | 537.3       | 654.3  | 15               |
|                                                                |         |                                                                                       | y8                                 | 704.9              | 980.5  | 708.9       | 988.5  | 39               |
|                                                                |         |                                                                                       | y9                                 | 739.4              | 1143.7 | 743.4       | 1151.7 | 34               |
| Ceruloplasmin                                                  | P00450  | GAYPLSIEPIGVR                                                                         | y8                                 | 686.4              | 870.5  | 691.4       | 880.5  | 37               |
| Chitinase-3-like protein 1                                     | P36222  | VTIDSSYDIAK <sup>a</sup>                                                              | y9                                 | 606.3              | 1011.5 | 610.3       | 1019.5 | 25               |
| Chromogranin-A                                                 | P10645  | ELQDLALQGA<br>EDSLEAGLPLQVR                                                           | y6                                 | 593.3              | 587.4  | 597.3       | 595.4  | 24               |
|                                                                |         |                                                                                       | y7                                 | 713.9              | 782.5  | 718.9       | 792.5  | 35               |
| Clusterin                                                      | P10909  | IDSLELDR                                                                              | y5                                 | 537.8              | 646.3  | 542.8       | 656.3  | 23               |
| Complement C3                                                  | P01024  | ISLPESLK<br>NTLIIYLDK                                                                 | y5                                 | 443.8              | 573.3  | 447.8       | 581.3  | 17               |
|                                                                |         |                                                                                       | y6                                 | 546.8              | 764.5  | 550.8       | 772.5  | 19               |
| Complement factor H                                            | P08603  | SSNLIILEHLK                                                                           | y7                                 | 698.4              | 881.5  | 702.4       | 889.5  | 33               |
| Contactin-1                                                    | Q12860  | FIPLIPIPER<br>DGEYVVEVR                                                               | y8                                 | 597.9              | 934.6  | 602.9       | 944.6  | 24               |
|                                                                |         |                                                                                       | y6                                 | 533.3              | 764.4  | 538.3       | 774.4  | 18               |
| Cystatin-C                                                     | P01034  | ALDFAVGEYK<br>LVGGPMDASVEEEGVR                                                        | y6                                 | 613.8              | 709.4  | 617.8       | 717.4  | 37               |
|                                                                |         |                                                                                       | y8                                 | 822.9              | 904.4  | 827.9       | 914.4  | 45               |
| Disintegrin and metalloproteinase domain-containing protein 22 | Q9P0K1  | FAISENPLITLR                                                                          | y9                                 | 687.4              | 1042.6 | 692.4       | 1052.6 | 29               |
| Gelsolin                                                       | P06396  | EVQGFESATFLGYFK                                                                       | y7                                 | 861.9              | 875.5  | 865.9       | 883.5  | 48               |
| Haptoglobin                                                    | P00738  | TEGDGVYTLNNEK                                                                         | y7                                 | 720.3              | 881.4  | 724.3       | 889.5  | 30               |
| Hemoglobin subunit alpha                                       | P69905  | VGAHAGEYGAELER                                                                        | y10                                | 765.4              | 1094.5 | 770.4       | 1104.5 | 44               |
| Hemoglobin subunit beta                                        | P68871  | SAVTALWVK<br>VNVDEVGGEALGR                                                            | y6                                 | 466.8              | 675.4  | 470.8       | 683.4  | 15               |
|                                                                |         |                                                                                       | y7                                 | 657.8              | 659.3  | 662.8       | 669.4  | 39               |
| Inter-alpha-trypsin inhibitor heavy chain H4                   | Q14624  | GPDVLTATVSGK                                                                          | y8                                 | 572.8              | 776.5  | 576.8       | 784.5  | 23               |
| Kallikrein-6                                                   | Q92876  | LSELIQPLPLER                                                                          | y6                                 | 704.4              | 724.4  | 709.4       | 734.4  | 32               |
| Leucine-rich alpha-2-glycoprotein                              | P02750  | DLLLPOPLDR                                                                            | y6                                 | 590.3              | 725.4  | 595.3       | 735.4  | 23               |
| N-acetyllactosaminide beta-1,3-N-acetylglucosaminyltransferase | O43505  | EPGEFALLR<br>TALASGGVLDASGDYR                                                         | y4                                 | 516.3              | 472.3  | 521.3       | 482.3  | 33               |
|                                                                |         |                                                                                       | y8                                 | 776.9              | 896.4  | 781.9       | 906.4  | 44               |
| Neural cell adhesion molecule 1                                | P13591  | GLGEISAASEFK                                                                          | y7                                 | 604.8              | 739.4  | 608.8       | 747.4  | 27               |
| Neuronal pentraxin receptor                                    | O95502  | ELDVLR                                                                                | y4                                 | 465.3              | 473.3  | 470.3       | 483.3  | 31               |
| Neurosecretory protein VGF                                     | O15240  | AYQGVAAFPK                                                                            | y8                                 | 574.8              | 786.5  | 578.8       | 794.5  | 35               |
| Neuroserpin                                                    | Q99574  | ALGITEIFIK <sup>a</sup><br>QEVPLATLEPLVK                                              | y6                                 | 552.8              | 750.4  | 556.8       | 758.5  | 23               |
|                                                                |         |                                                                                       | y10                                | 718.9              | 1080.7 | 722.9       | 1088.7 | 37               |
| Neurotrimin                                                    | Q9P121  | VTVNYPPISEAK                                                                          | y8                                 | 740.9              | 904.5  | 744.9       | 912.5  | 31               |
|                                                                |         |                                                                                       | y5                                 | 489.3              | 557.3  | 493.3       | 565.3  | 19               |
| Pigment epithelium-derived factor                              | P36955  | SSFVAPLEK<br>DTDTGALLFIGK                                                             | y5                                 | 489.3              | 557.3  | 493.3       | 565.3  | 19               |
|                                                                |         |                                                                                       | y8                                 | 625.8              | 818.5  | 629.8       | 826.5  | 29               |
| ProSAAS                                                        | Q9UHG2  | GEAAGAVQELAR<br>ILAGSADSEGVAAPR                                                       | y6                                 | 586.3              | 715.4  | 591.3       | 725.4  | 36               |
|                                                                |         |                                                                                       | y9                                 | 707.4              | 901.4  | 712.4       | 911.4  | 41               |
| Prostaglandin-H2 D-isomerase                                   | P41222  | WFSAGLASNSSWLR<br>AQGFTEDTIVFLPQTDK                                                   | y8                                 | 791.4              | 920.5  | 796.4       | 930.5  | 38               |
|                                                                |         |                                                                                       | y7                                 | 637.3              | 848.5  | 640.0       | 856.5  | 22               |
| Protein kinase C-binding protein NELL2                         | Q99435  | AFLFQDTPR                                                                             | y6                                 | 547.8              | 763.4  | 552.8       | 773.4  | 34               |
| Protein S100-B                                                 | P04271  | AMVALIDVFHQYSGR                                                                       | y7                                 | 569.6              | 894.4  | 573.0       | 904.4  | 28               |
| Secretogranin-1                                                | P05060  | NYLNYGEEGAPGK <sup>a</sup><br>GEAGAPGEEDIQGPVK                                        | y8                                 | 706.3              | 744.4  | 710.3       | 752.4  | 31               |
|                                                                |         |                                                                                       | y11                                | 778.4              | 1170.6 | 782.4       | 1178.6 | 39               |
| Secretogranin-2                                                | P13521  | VLEYLNQEK<br>IILEALR                                                                  | y7                                 | 568.3              | 923.4  | 572.3       | 931.5  | 21               |
|                                                                |         |                                                                                       | y5                                 | 414.3              | 601.4  | 419.3       | 611.4  | 17               |
| Secretogranin-3                                                | Q8WXD2  | TEAYLEAIRK<br>LNVEDVDSTK                                                              | y6                                 | 597.3              | 729.5  | 601.3       | 737.5  | 36               |
|                                                                |         |                                                                                       | y6                                 | 560.3              | 664.3  | 564.3       | 672.3  | 35               |
| Selenoprotein P                                                | P49908  | LPTDSELAPR                                                                            | y8                                 | 549.8              | 888.4  | 554.8       | 898.5  | 19               |
| Semaphorin-7A                                                  | O75326  | VYLFDFPEGK                                                                            | y8                                 | 607.8              | 952.5  | 611.8       | 960.5  | 21               |
| Serotransferrin                                                | P02787  | YLGEEYVK                                                                              | y6                                 | 500.8              | 724.4  | 504.8       | 732.4  | 17               |
| Serum albumin                                                  | P02768  | LVNEVTEFAK                                                                            | y6                                 | 575.3              | 694.4  | 579.3       | 702.4  | 27               |
| Serum amyloid P-component                                      | P02743  | VVFVPR                                                                                | y4                                 | 382.7              | 518.3  | 387.7       | 528.3  | 15               |
| Transthyretin                                                  | P02766  | AADDTWEPFASGK                                                                         | y8                                 | 697.8              | 921.4  | 701.8       | 929.5  | 25               |
| Vitronectin                                                    | P04004  | FEDGVLDPPYPR                                                                          | y10                                | 711.8              | 1146.5 | 716.8       | 1156.6 | 18               |
